# Supplementary material for: The allopurinol metabolite, oxypurinol, drives oligoclonal expansions of drug‐reactive T cells in resolved hypersensitivity cases and drug‐naïve healthy donors
Source: PubMed Central journal article supplement — Allergy. 2023 Jul 14;78(11):2980–93. doi: 10.1111/all.15814 (PMC10952278; doi:10.1111/all.15814), 2023-07-14

# Supp Figure 4

## A AP013/ALP

### TRAVJ

### TRBVJ

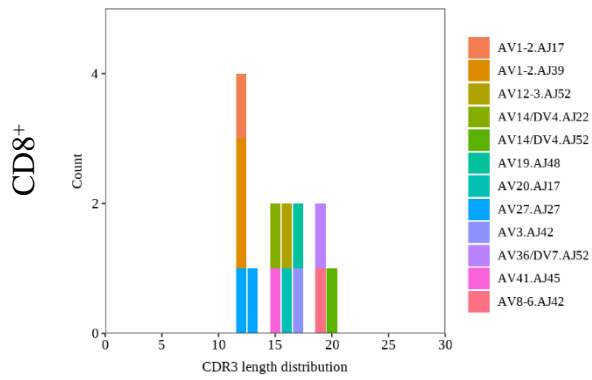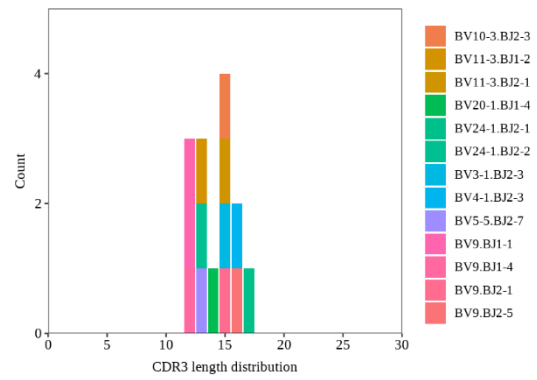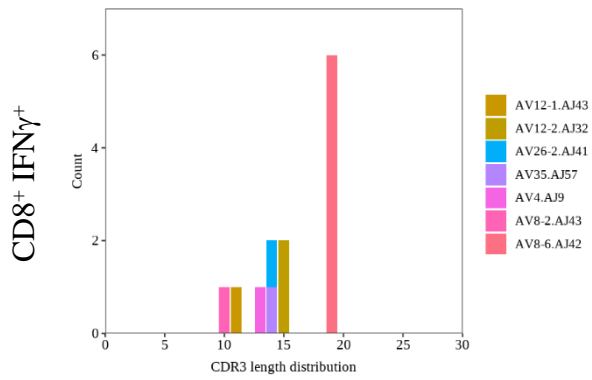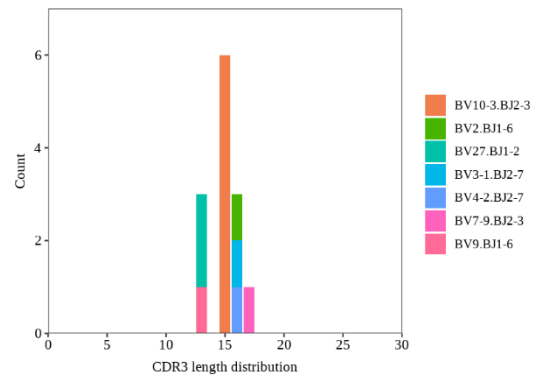

## B AP018/ALP

### TRAVJ

### TRBVJ

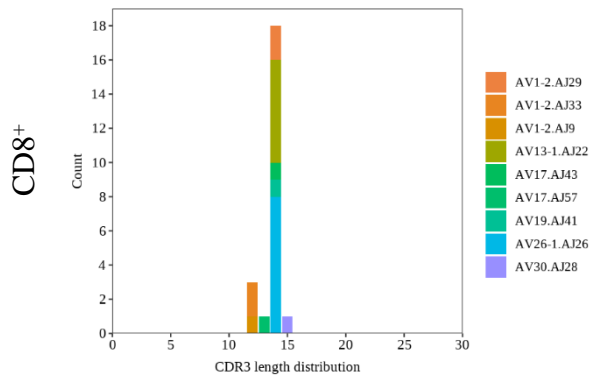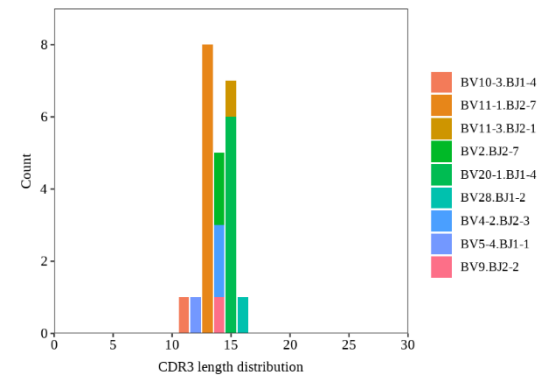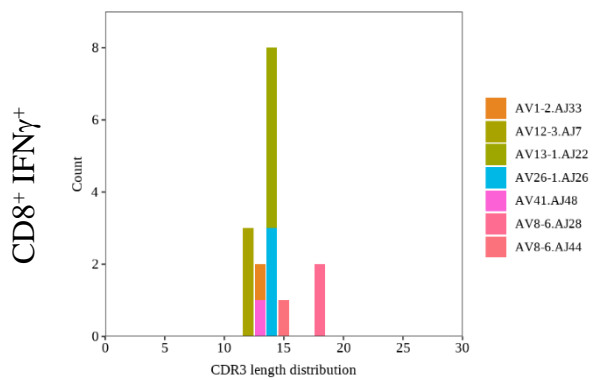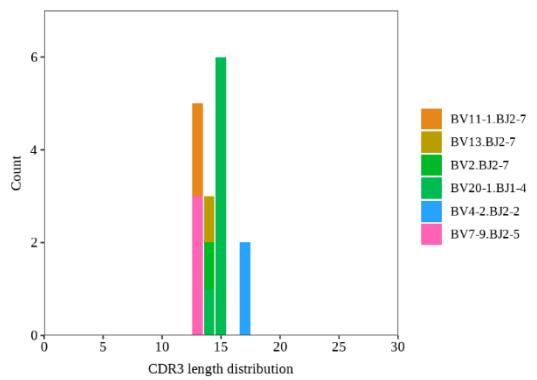

**C** AP013/OXP

**TRAVJ**

**TRBVJ**

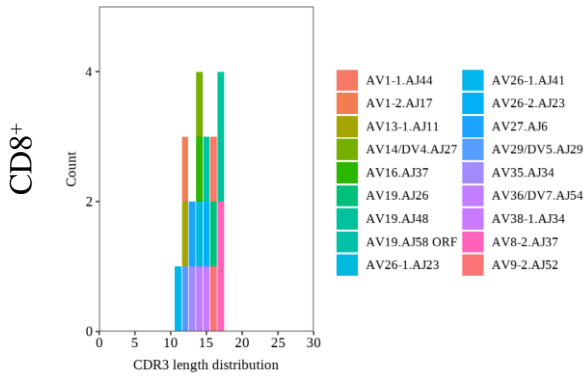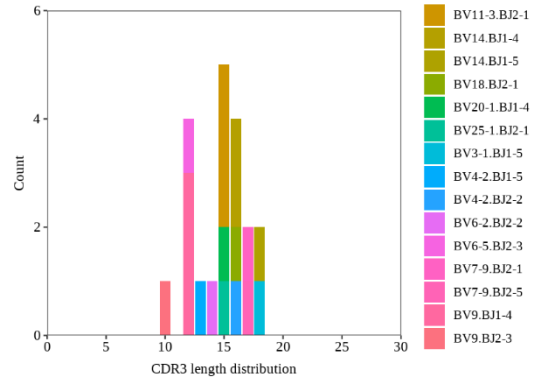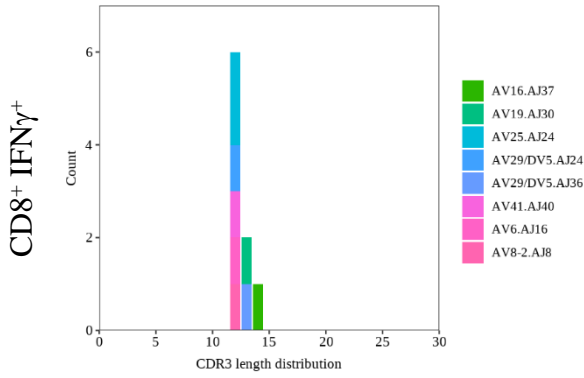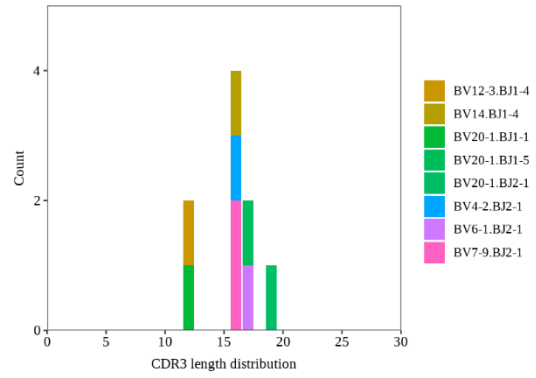

**D** AP018/OXP

**TRAVJ**

**TRBVJ**

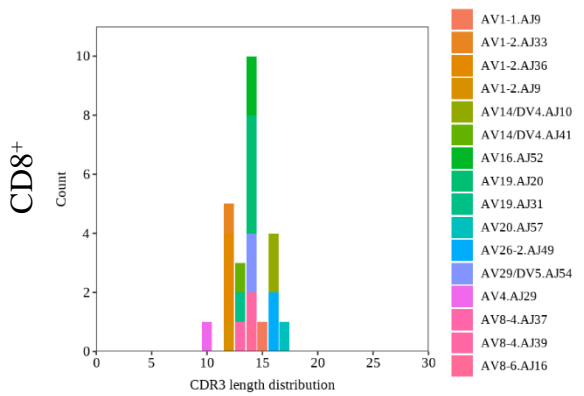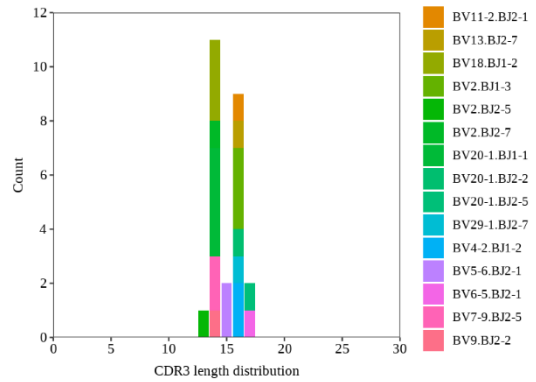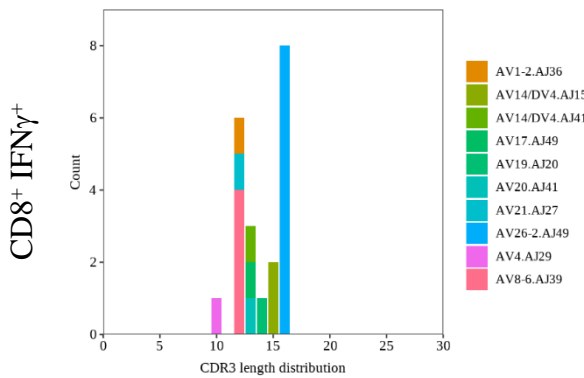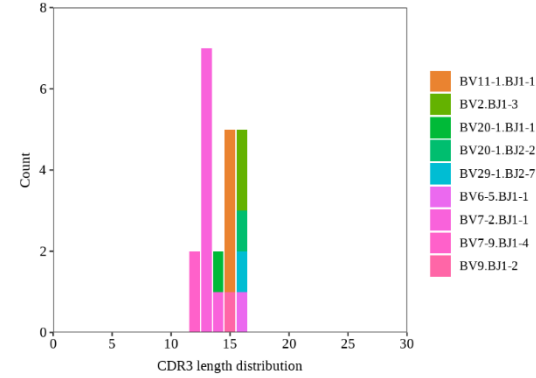

**E** CU002/OXP

**TRAVJ**

**TRBVJ**

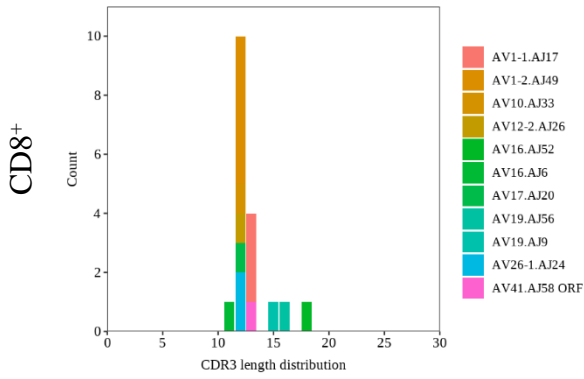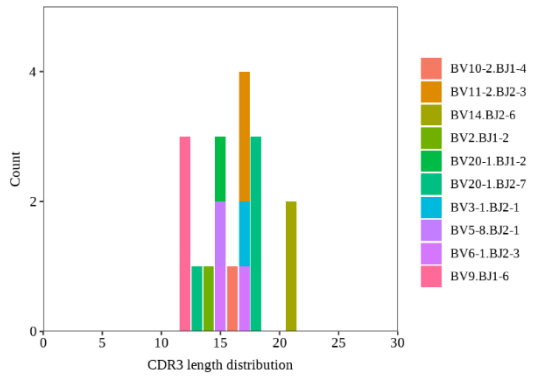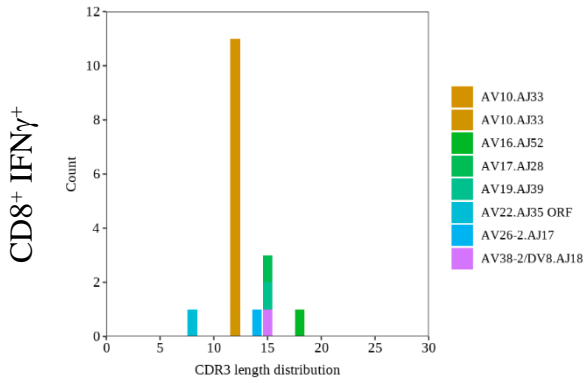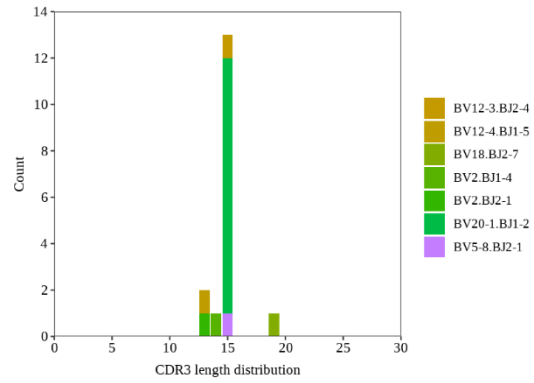

**F** CU003/OXP

**TRAVJ**

**TRBVJ**

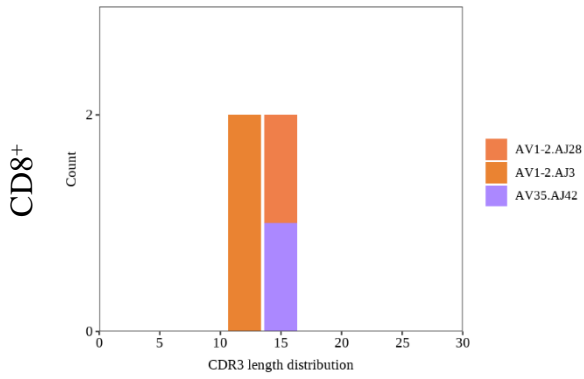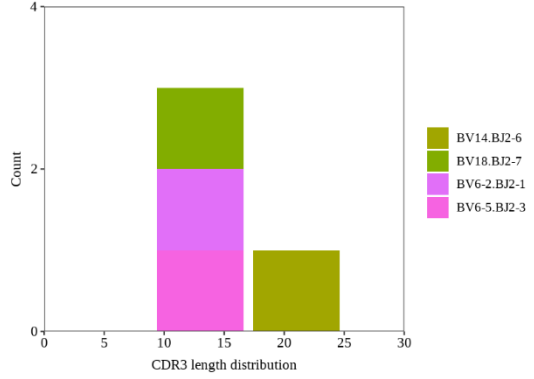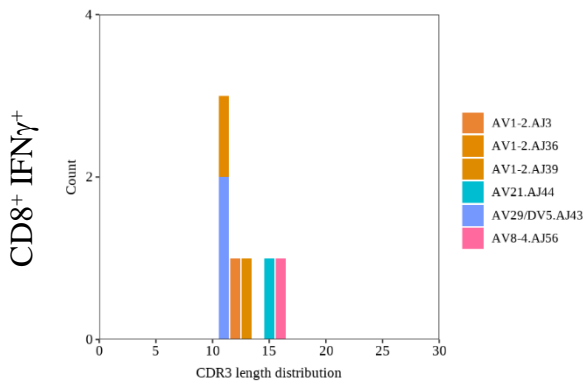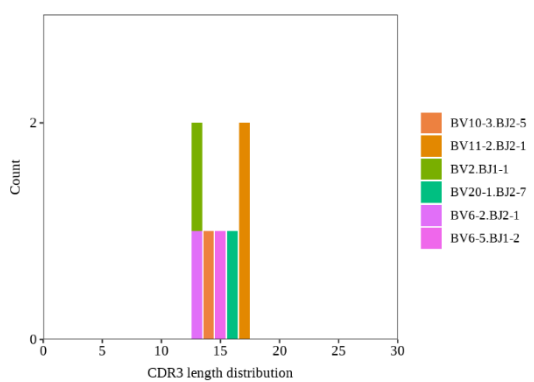

G CU006/OSP

TRAVJ

TRBVJ

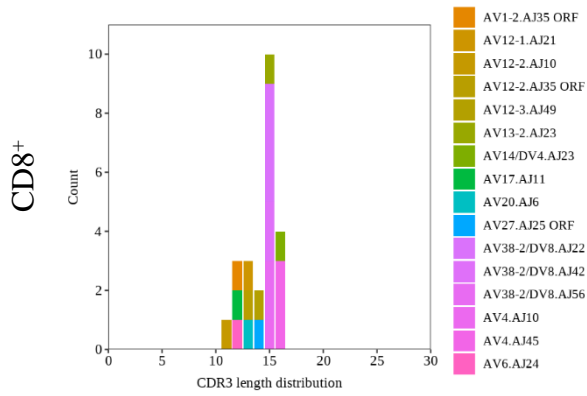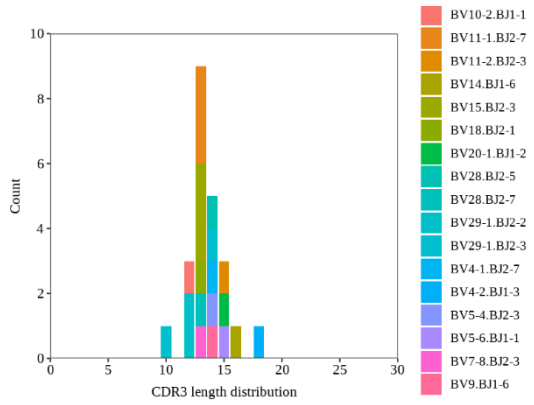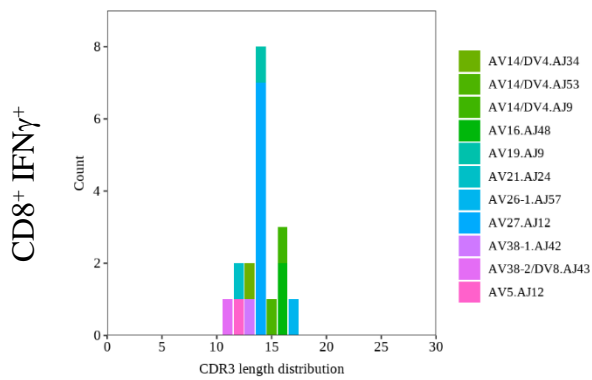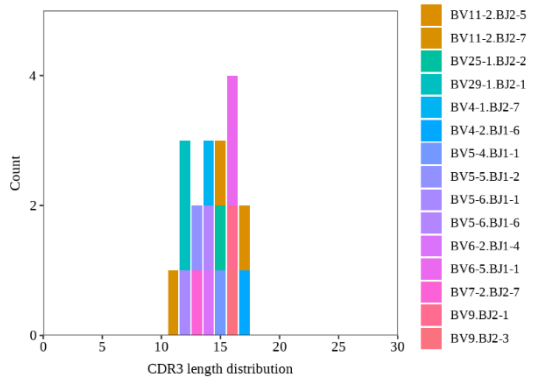

Supplement: ALL-78-2980-s006.pdf [file ALL-78-2980-s006.pdf]
