# Supplementary figures and images for: The allopurinol metabolite, oxypurinol, drives oligoclonal expansions of drug‐reactive T cells in resolved hypersensitivity cases and drug‐naïve healthy donors
Source: PubMed Central journal article supplement — Allergy. 2023 Jul 14;78(11):2980–93. doi: 10.1111/all.15814 (PMC10952278; doi:10.1111/all.15814), 2023-07-14

Supp Figure 1

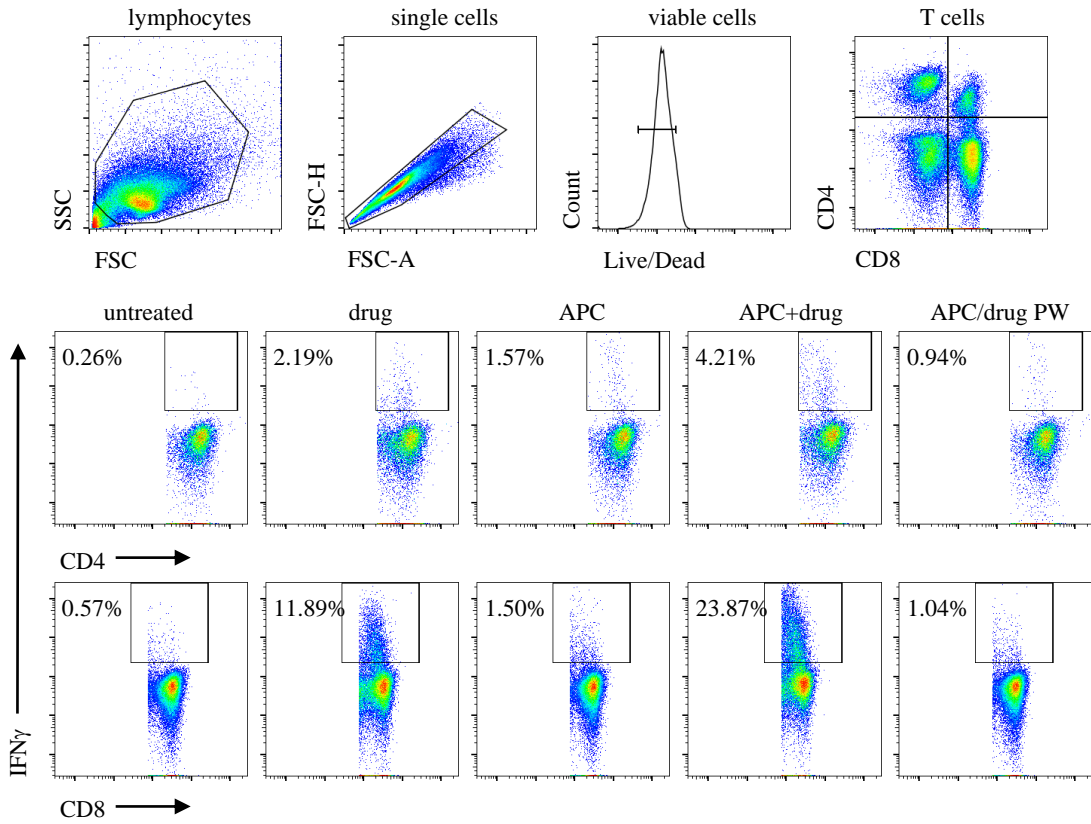

Supplement: ALL-78-2980-s001.pdf [file ALL-78-2980-s001.pdf]

Supp Figure 2

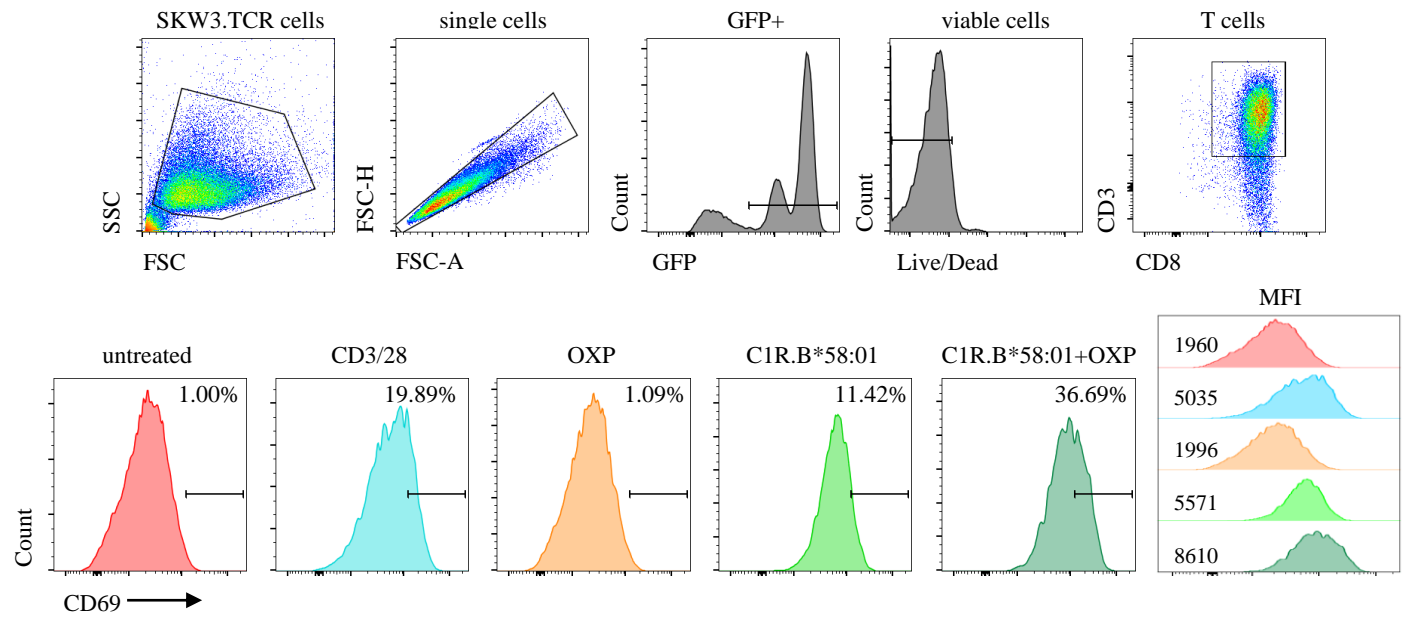

Supplement: ALL-78-2980-s002.pdf [file ALL-78-2980-s002.pdf]

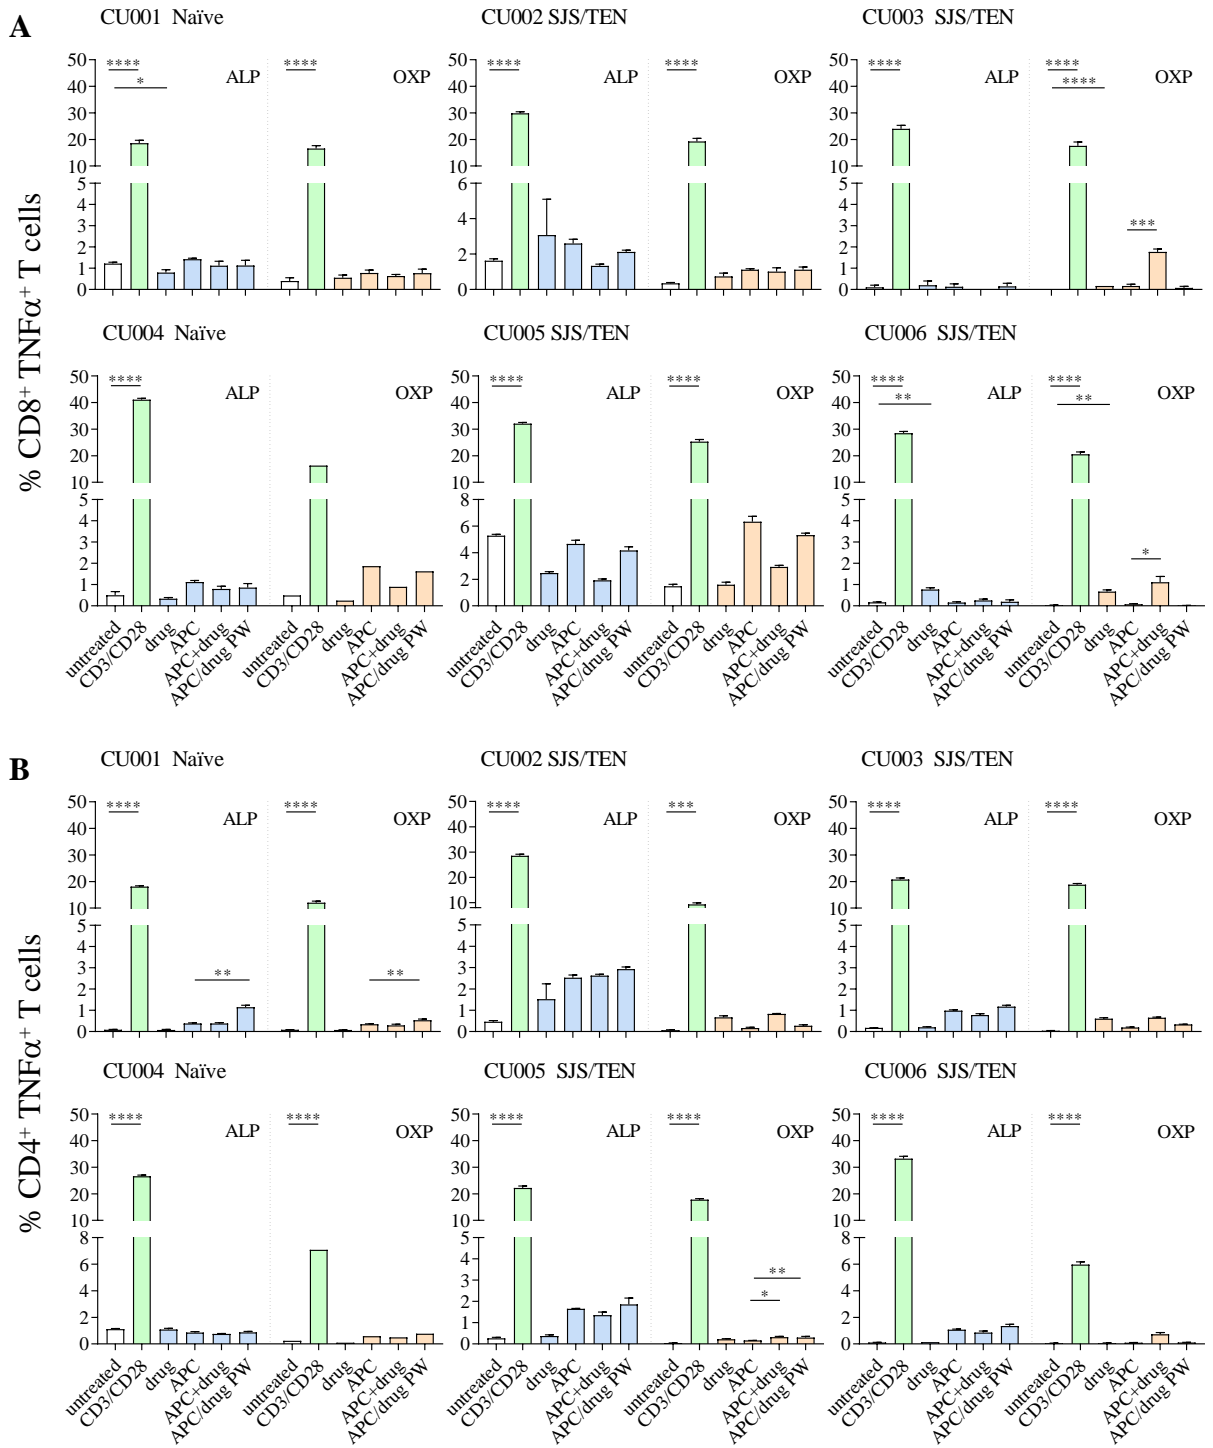

Supplement: ALL-78-2980-s004.pdf [file ALL-78-2980-s004.pdf]
